# Supplementary material for: Chemical Composition and Pharmacological Effects of Geopropolis Produced by Melipona quadrifasciata anthidioides
Source: Hindawi journal article supplement (doi:10.1155/2017/8320804), 2017-01-01
Supplement: f2 [file 8320804.f2.pdf]

## Supplementary Material

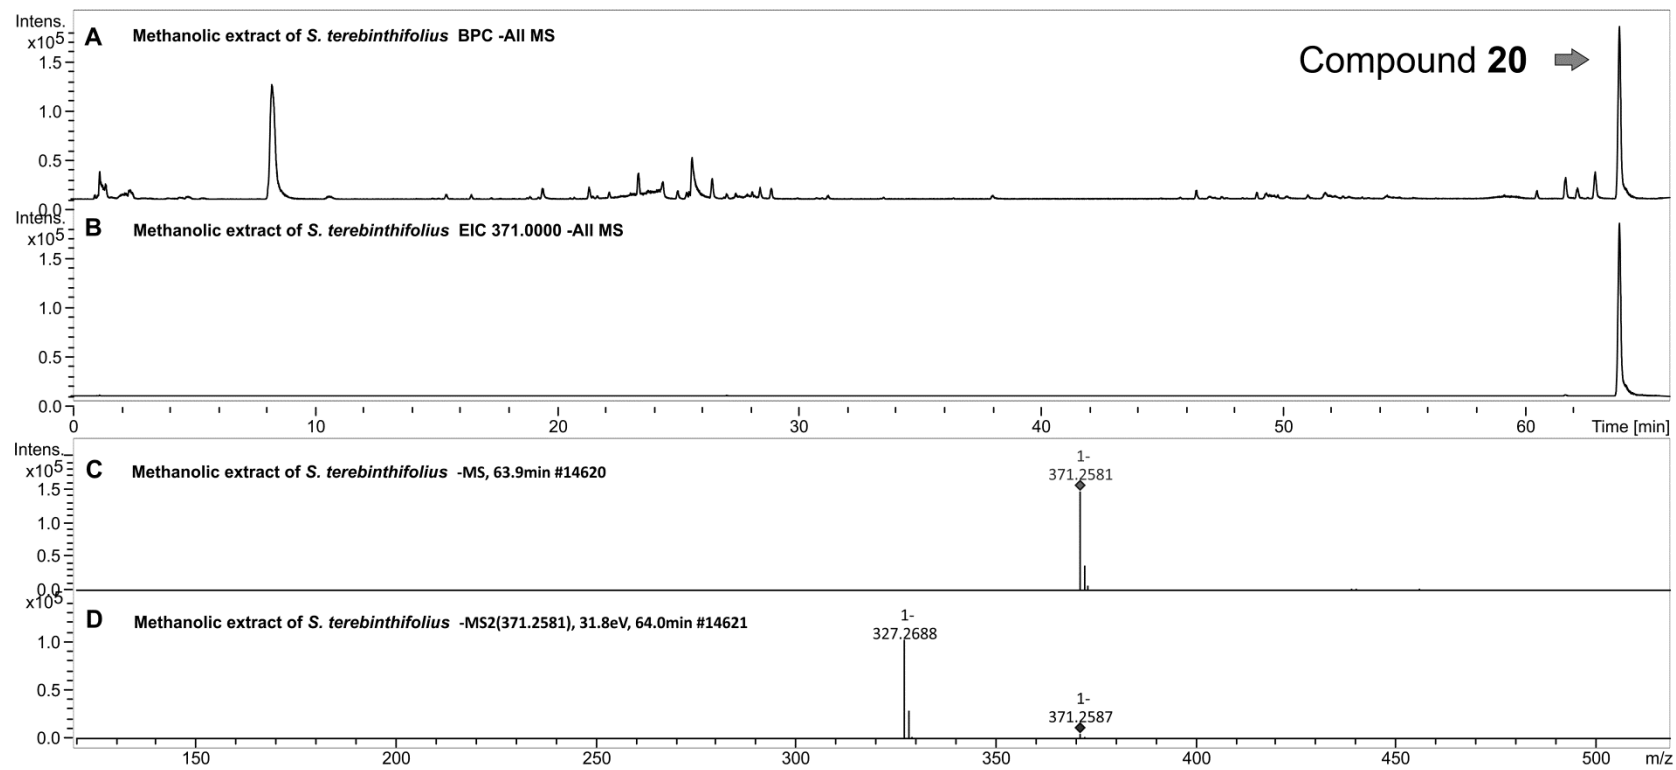

**Supplementary Material.** Base peak chromatogram of methanolic extract of the leaves of *Schinus terebinthifolius* in negative ionization mode.
